# Supplementary material for: Water compatible Pd nanoparticle catalysts supported on microporous polymers: their controllable microstructure and extremely low Pd-leaching behaviour
Source: Royal Society of Chemistry journal article supplement (doi:10.1039/c3ta01407j), 2013-01-01
Supplement: c3ta01407j.pdf [file c3ta01407j.pdf]

Electronic Supplementary Information

**Water compatible Pd nanoparticles catalysts supported on microporous polymers: their controllable microstructure and extremely low Pd-leaching behaviour**

*Yaoyao Yang,<sup>a,b</sup> Shin Ogasawara,<sup>b</sup> Guang Li<sup>a</sup> and Shinji Kato<sup>\*b</sup>*

<sup>a</sup> State Key Laboratory for Modification of Chemical Fibers and Polymer Materials, College of Materials Science and Engineering, Donghua University, Shanghai 201620, China

<sup>b</sup> Kawamura Institute of Chemical Research, 631 Sakado, Sakura, Chiba 285-0078, Japan

Number of pages: 4

Number of figures: 5

Number of tables: 1

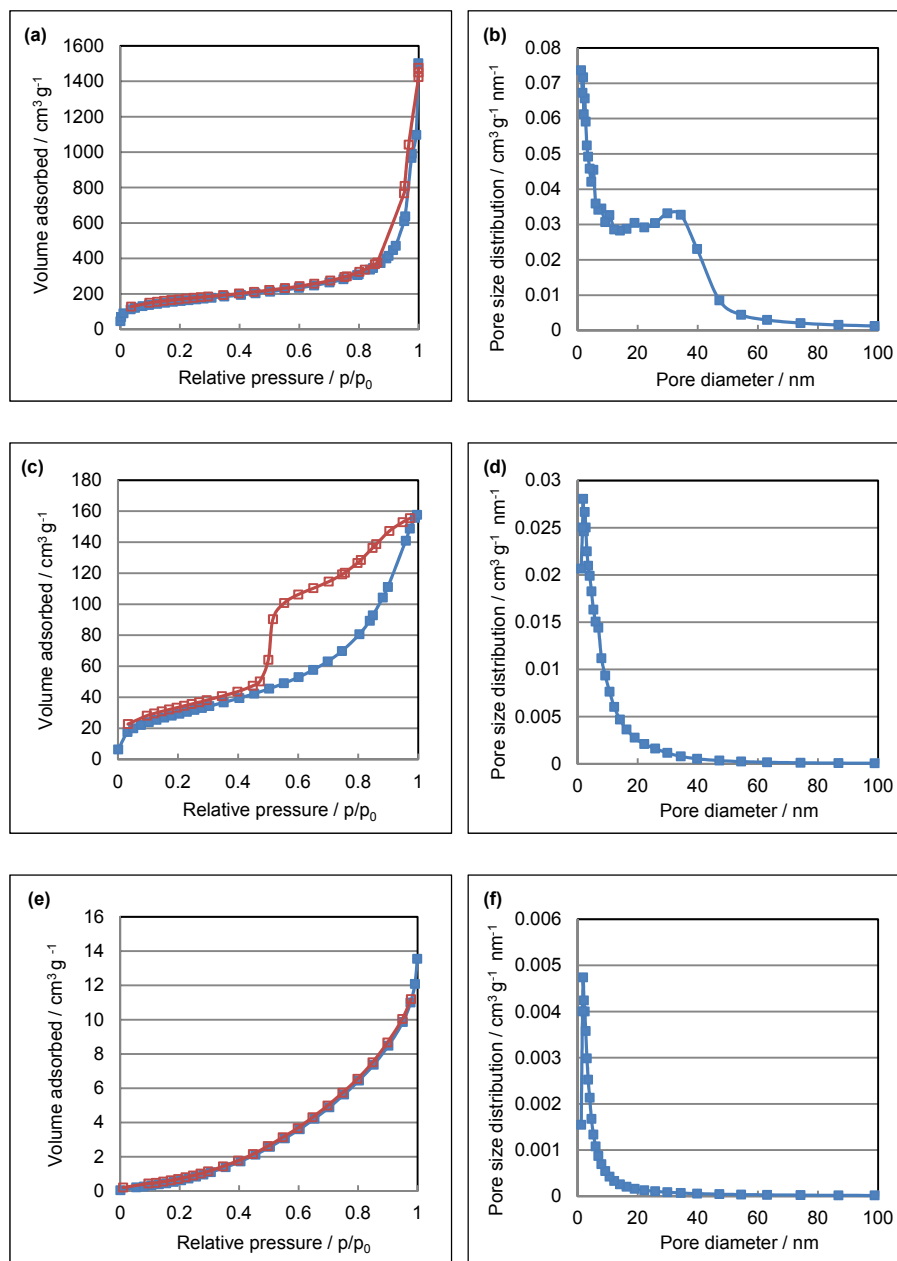

**Fig. S1**  $N_2$  adsorption (filled blue squares)–desorption (open red squares) isotherms and pore size distribution characteristics from BJH analysis of the desorption data. (a and b) **D-EG**. (c and d) **D-BG**. (e and f) **D-HX**.

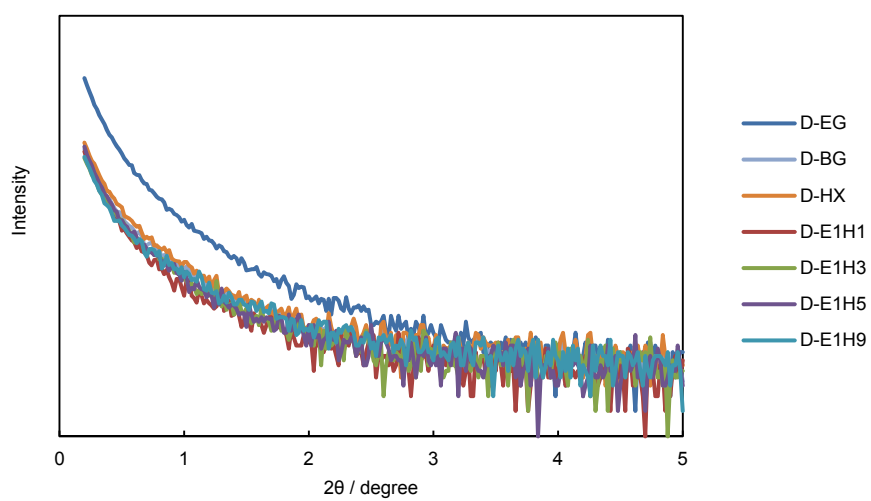

**Fig. S2** Small-angle X-ray scattering (SAXS) patterns of the polymers.

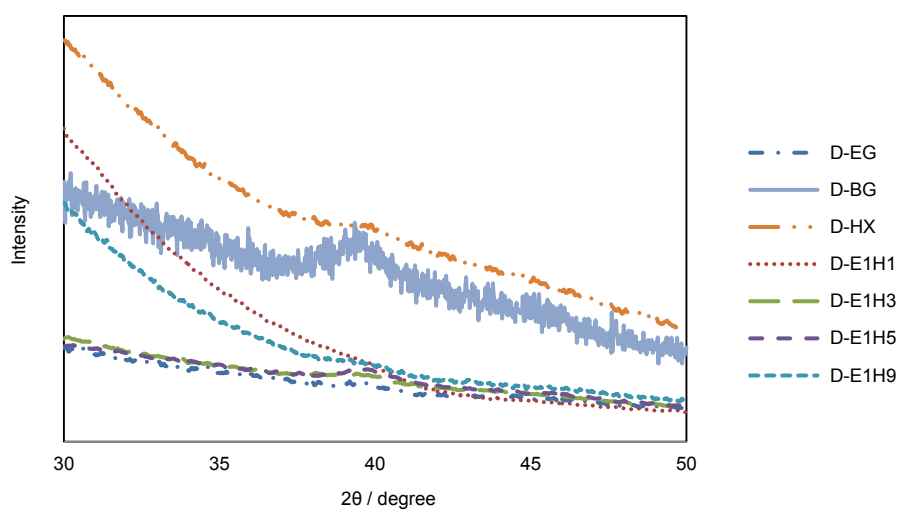

**Fig. S3** Wide-angle X-ray scattering (WAXS) patterns of the polymers.

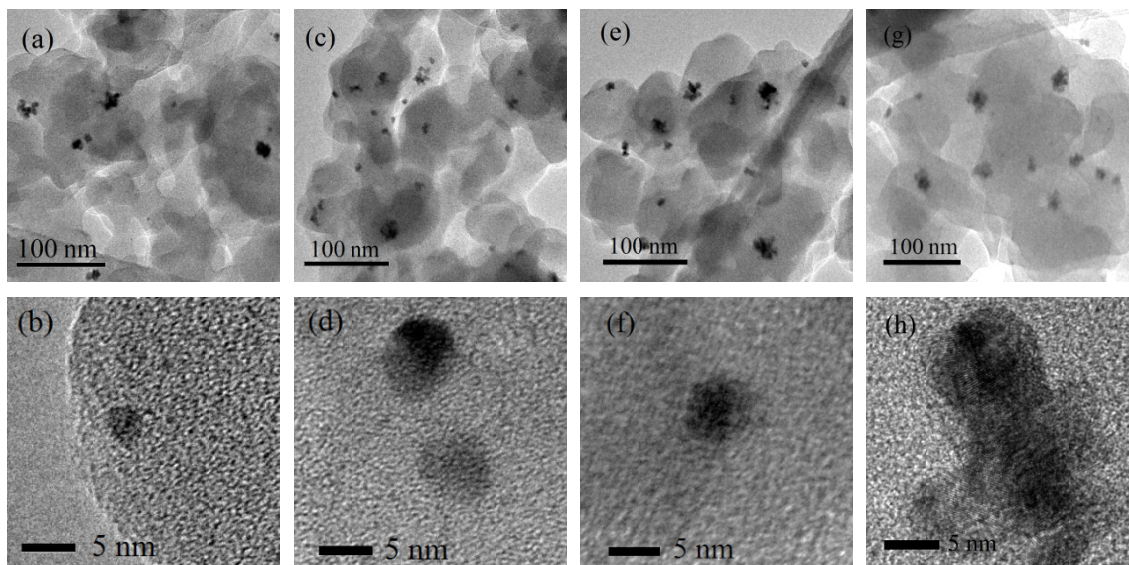

**Fig. S4** TEM images of created PdNPs in the polymers: (a and b) **D-E1H1**; (c and d) **D-E1H3**; (e and f) **D-E1H5**; (g and h) **D-E1H9**. The polymers were applied onto micro grids with carbon membrane and imaged using 200 kV accelerating voltage.

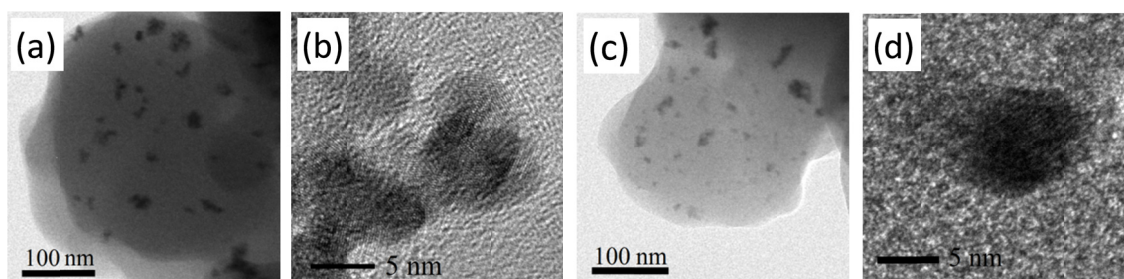

**Fig. S5** TEM images of PdNPs in the polymers that were used for catalytic reactions once. (a and b) **D-HX**; (c and d) **D-E1H9**.

**Table S1.** Porosity data of the polymers which belong to mixed monomers system.

| <b>Polymer</b> | <b>BET specific<br/>surface area<br/>(m<sup>2</sup>g<sup>-1</sup>)</b> | <b>BJH pore<br/>volume<br/>(cm<sup>3</sup>g<sup>-1</sup>)</b> | <b>BJH average<br/>pore width<br/>(nm)</b> |
|----------------|------------------------------------------------------------------------|---------------------------------------------------------------|--------------------------------------------|
| <b>D-E3H1</b>  | 384                                                                    | 1.00                                                          | 13.8                                       |
| <b>D-E1H1</b>  | 208                                                                    | 0.43                                                          | 9.80                                       |
| <b>D-E1H3</b>  | 75.0                                                                   | 0.23                                                          | 11.0                                       |
| <b>D-E1H4</b>  | 13.9                                                                   | 0.07                                                          | 10.8                                       |
| <b>D-E1H5</b>  | 1.81                                                                   | 0.02                                                          | 8.08                                       |
| <b>D-E1H7</b>  | 2.22                                                                   | 0.03                                                          | 8.72                                       |
| <b>D-E1H9</b>  | 0.87                                                                   | 0.02                                                          | 7.35                                       |
| <b>D-E1H19</b> | 0.98                                                                   | 0.02                                                          | 7.67                                       |
